# Supplementary material for: Traveling waves in the prefrontal cortex during working memory
Source: bioRxiv or medRxiv preprint supplement (doi:10.1101/2021.04.08.438959), 2022-01-10
Supplement: Supplementary file [file media-2.pdf]

**SUPPLEMENTARY FIGURE 2**

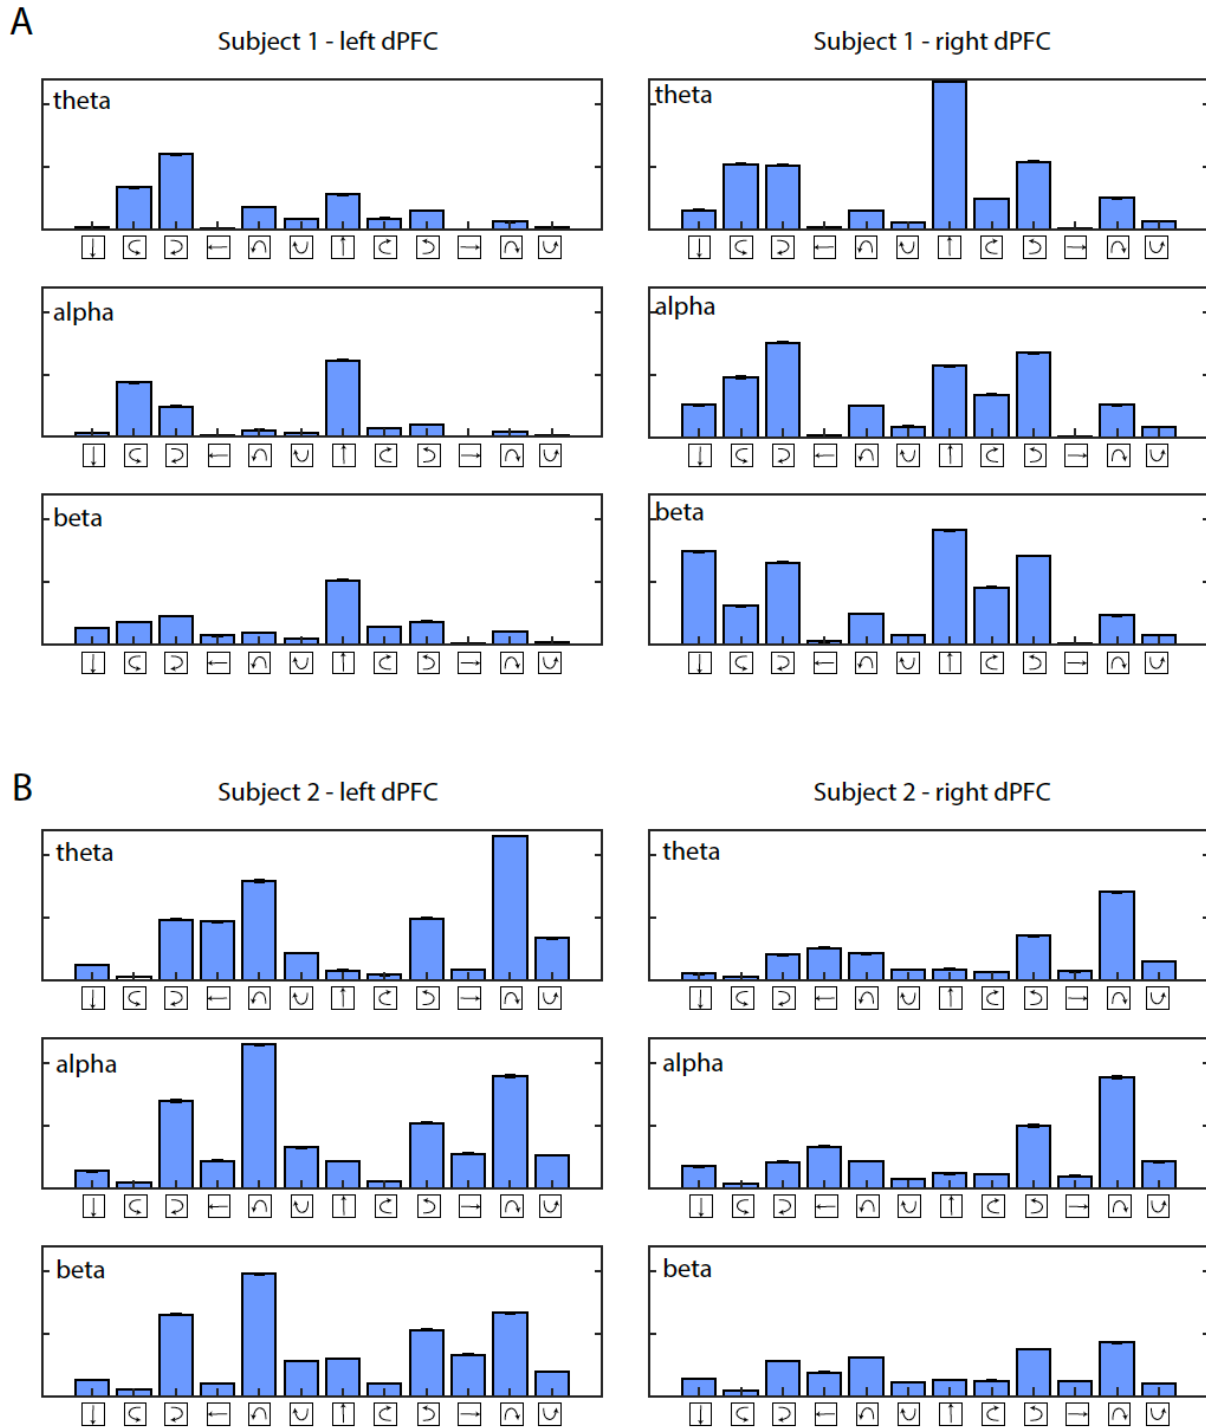

Supplemental Fig. 2: (A, B) Number of wave instants observed for different wave types across frequencies and arrays.
