# Supplementary material for: Traveling waves in the prefrontal cortex during working memory
Source: bioRxiv or medRxiv preprint supplement (doi:10.1101/2021.04.08.438959), 2022-01-10
Supplement: Supplementary file [file media-3.pdf]

**Supplemental Movie S1:** An example beta-band planar wave on the 8x8 left dIPFC array from a trial in Subject 2, corresponding to the panels in Fig. 1. Each tile marks the LFP oscillation amplitude (warmer colors mean higher amplitude) at that point in time and space.

<https://youtu.be/3DhmbRZ8oa8>
