# Supplementary material for: Traveling waves in the prefrontal cortex during working memory
Source: bioRxiv or medRxiv preprint supplement (doi:10.1101/2021.04.08.438959), 2022-01-10
Supplement: Supplementary file [file media-4.pdf]

**Supplemental Movie S2:** An example of a theta rotating wave on the 8x8 array, during the memory delay period of a trial in the right dIPFC of Subject 1. Each tile marks the LFP oscillation amplitude (warmer colors mean higher amplitude) at that point in time and space.  
<https://youtu.be/GY9-XtFnpZo>
